# Supplementary material
Source: PubMed Central journal article supplement (PMC3529382)

Supplemental Figure 1. ER $\beta$  able to mediate glucocorticoid-induced GILZ expression. A) GILZ mRNA was quantified 6 h following treatment with vehicle, 100 nM Dex, 1 $\mu$ M Liq or 100 nM Dex and 1  $\mu$ M Liq by QRT-PCR. Values were normalized to the housekeeping gene Cyclophilin B. Bar graphs show mean  $\pm$  SEM. The symbols represent values that are statistically different at  $p < 0.01$  from one another as determined by Tukey's post-hoc analysis following ANOVA. B) GILZ expression was determined by QRT-PCR in ECC1 cells co-treated in the presence or absence of 150 nM PHTPP and vehicle, 100 nM Dex, 10 nM E<sub>2</sub>, or 100 nM Dex and 10 nM E<sub>2</sub> for 6 h. Values were normalized to the housekeeping gene Cyclophilin B. Bar graphs show mean  $\pm$  SEM. \* $p < 0.05$  as determined by ANOVA.

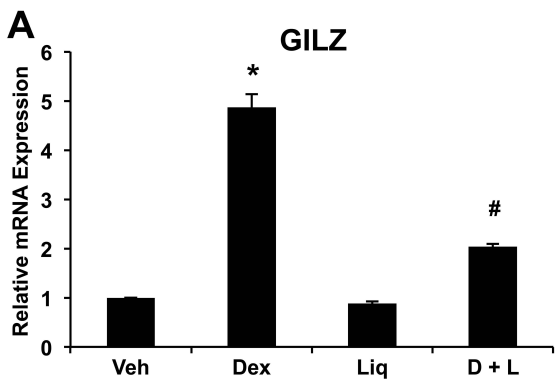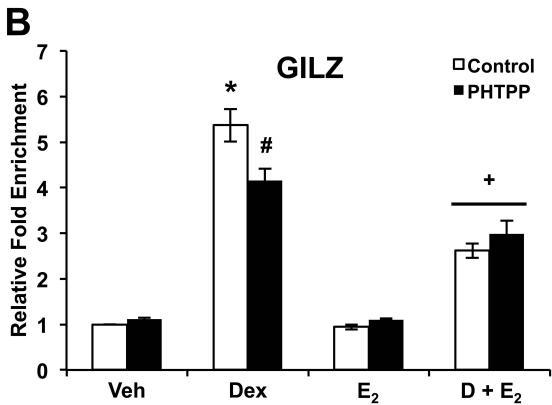

Supplement: supp_en.2012-1748_En-12-1748suppfigure_1.pdf [file supp_en.2012-1748_En-12-1748suppfigure_1.pdf]
